# Supplementary material
Source: HighWire-hosted journal article supplement (https://www.jrheum.org/highwire/filestream/42786/field_highwire_adjunct_files/0/220425DataSuppl.pdf)
Supplement: 220425DataSuppl.pdf [file 220425DataSuppl.pdf]

**Table S1: Prevalence of gout in 1990 and 2019 and the percentage change in the age-standardised rates (ASRs) per 100,000 in the North Africa and the Middle East region**  
(Generated from data available from <http://ghdx.healthdata.org/gbd-results-tool>)

|                                     | 1990                               |                                | 2019                                 |                                | Percentage change in ASRs per 100,000 |
|-------------------------------------|------------------------------------|--------------------------------|--------------------------------------|--------------------------------|---------------------------------------|
|                                     | No (95% UI)                        | ASRs per 100,000 (95% UI)      | No (95% UI)                          | ASRs per 100,000 (95% UI)      |                                       |
| <b>North Africa and Middle East</b> | <b>857082</b><br>(681502, 1072547) | <b>454.6</b><br>(363.3, 569)   | <b>2455601</b><br>(1940521, 3045022) | <b>509.1</b><br>(406, 633.9)   | <b>12</b><br>(10.1, 13.9)             |
| <b>Afghanistan</b>                  | <b>28729</b><br>(22655, 37110)     | <b>401.6</b><br>(318.9, 507.4) | <b>67747</b><br>(53802, 84327)       | <b>437.9</b><br>(349.6, 543.6) | <b>9.1</b><br>(2.6, 15.8)             |
| <b>Algeria</b>                      | <b>57855</b><br>(45600, 72318)     | <b>441.8</b><br>(349.9, 548.9) | <b>184417</b><br>(145466, 232406)    | <b>509.1</b><br>(399.3, 637.9) | <b>15.2</b><br>(8.3, 22.4)            |
| <b>Bahrain</b>                      | <b>1448</b><br>(1131, 1809)        | <b>535</b><br>(418.7, 671.8)   | <b>9085</b><br>(7019, 11495)         | <b>611.5</b><br>(485.4, 762.1) | <b>14.3</b><br>(7.1, 22.1)            |
| <b>Egypt</b>                        | <b>149196</b><br>(118480, 186278)  | <b>463.4</b><br>(369.7, 582.6) | <b>374416</b><br>(293642, 470254)    | <b>540.5</b><br>(430.3, 674.5) | <b>16.7</b><br>(10.4, 23.5)           |
| <b>Iran (Islamic Republic of)</b>   | <b>132170</b><br>(102722, 167135)  | <b>455.2</b><br>(361.8, 573.1) | <b>390085</b><br>(307601, 486535)    | <b>489.3</b><br>(388.1, 616.9) | <b>7.5</b><br>(5.4, 9.3)              |
| <b>Iraq</b>                         | <b>41915</b><br>(32928, 52194)     | <b>489.5</b><br>(386.1, 612.4) | <b>132187</b><br>(103630, 163705)    | <b>498.8</b><br>(395.2, 619.9) | <b>1.9</b><br>(-3.9, 8.1)             |
| <b>Jordan</b>                       | <b>7563</b><br>(5973, 9451)        | <b>476.1</b><br>(378, 590.1)   | <b>42332</b><br>(33155, 52869)       | <b>543.6</b><br>(429.6, 678.2) | <b>14.2</b><br>(7.7, 20.9)            |
| <b>Kuwait</b>                       | <b>5304</b><br>(4128, 6650)        | <b>575.1</b><br>(448.6, 724.2) | <b>22340</b><br>(17580, 28038)       | <b>612.2</b><br>(485.7, 762.6) | <b>6.5</b><br>(-0.5, 15.2)            |
| <b>Lebanon</b>                      | <b>10984</b><br>(8588, 13903)      | <b>463.3</b><br>(364.5, 583.9) | <b>26596</b><br>(21125, 33162)       | <b>504.8</b><br>(400.9, 633.2) | <b>9</b><br>(2.6, 15.6)               |
| <b>Libya</b>                        | <b>10559</b><br>(8330, 13215)      | <b>506.3</b><br>(400.3, 632.4) | <b>31013</b><br>(24447, 38517)       | <b>525.6</b><br>(418.7, 659.2) | <b>3.8</b><br>(-2.1, 9.9)             |
| <b>Morocco</b>                      | <b>63347</b><br>(50153, 79926)     | <b>426.4</b><br>(339.4, 537.5) | <b>157478</b><br>(125035, 198113)    | <b>476.3</b><br>(381.3, 597.3) | <b>11.7</b><br>(6.3, 18.3)            |
| <b>Oman</b>                         | <b>4162</b><br>(3283, 5179)        | <b>452.2</b><br>(358.5, 565.5) | <b>16883</b><br>(13104, 21241)       | <b>574.8</b><br>(454.3, 723.6) | <b>27.1</b><br>(19.5, 35.4)           |
| <b>Palestine</b>                    | <b>4123</b><br>(3259, 5147)        | <b>440</b><br>(350.4, 549.1)   | <b>13342</b><br>(10565, 16661)       | <b>475.3</b><br>(373.9, 590.6) | <b>8</b><br>(1.6, 14.9)               |
| <b>Qatar</b>                        | <b>1531</b><br>(1166, 1959)        | <b>622.4</b><br>(489.6, 780.6) | <b>14251</b><br>(10929, 18189)       | <b>734.8</b><br>(582.2, 921.1) | <b>18.1</b><br>(10, 27.2)             |
| <b>Saudi Arabia</b>                 | <b>38172</b><br>(30051, 47291)     | <b>513.6</b><br>(409, 643.6)   | <b>157065</b><br>(122656, 199612)    | <b>607.8</b><br>(483, 760.2)   | <b>18.3</b><br>(11, 25.4)             |

|                             |                                    |                                 |                                    |                                 |                              |
|-----------------------------|------------------------------------|---------------------------------|------------------------------------|---------------------------------|------------------------------|
| <b>Sudan</b>                | <b>41330</b><br>(32987 , 51609)    | <b>409.4</b><br>(325.1 , 511.7) | <b>103804</b><br>(81093 , 129860)  | <b>486.4</b><br>(383.9 , 615.4) | <b>18.8</b><br>(11.7 , 25.7) |
| <b>Syrian Arab Republic</b> | <b>26937</b><br>(21260 , 33632)    | <b>465.7</b><br>(370.9 , 581.3) | <b>63962</b><br>(50266 , 81403)    | <b>493.5</b><br>(393.2 , 623.2) | <b>6</b><br>(0.3 , 12.1)     |
| <b>Tunisia</b>              | <b>23816</b><br>(18872 , 29524)    | <b>444.5</b><br>(352.5 , 550)   | <b>61954</b><br>(48867 , 78282)    | <b>479.3</b><br>(380.9 , 602.7) | <b>7.8</b><br>(1.8 , 15)     |
| <b>Turkey</b>               | <b>180731</b><br>(141587 , 225875) | <b>463.9</b><br>(366.3 , 579.4) | <b>462176</b><br>(364077 , 573854) | <b>507.8</b><br>(400.6 , 634.6) | <b>9.5</b><br>(3.6 , 15.2)   |
| <b>United Arab Emirates</b> | <b>5098</b><br>(3875 , 6527)       | <b>552.6</b><br>(437 , 694.2)   | <b>54993</b><br>(40988 , 71980)    | <b>664.8</b><br>(525.4 , 831.2) | <b>20.3</b><br>(11.8 , 29.5) |
| <b>Yemen</b>                | <b>21536</b><br>(16996 , 27033)    | <b>380</b><br>(301 , 479.9)     | <b>66982</b><br>(53318 , 82420)    | <b>427.8</b><br>(340.5 , 534.9) | <b>12.6</b><br>(5.7 , 19.8)  |

**Table S2: Incidence of gout in 1990 and 2019 and the percentage change in the age-standardised rates (ASRs) per 100,000 in the North Africa and the Middle East region**  
(Generated from data available from <http://ghdx.healthdata.org/gbd-results-tool>)

|                                     | 1990                               |                                | 2019                               |                                | Percentage change in ASRs per 100,000 |
|-------------------------------------|------------------------------------|--------------------------------|------------------------------------|--------------------------------|---------------------------------------|
|                                     | No (95% UI)                        | ASRs per 100,000 (95% UI)      | No (95% UI)                        | ASRs per 100,000 (95% UI)      |                                       |
| <b>North Africa and Middle East</b> | <b>174221</b><br>(139118 , 217815) | <b>88</b><br>(70.5 , 110.9)    | <b>490264</b><br>(389868 , 606813) | <b>97.7</b><br>(78.5 , 123.2)  | <b>11.1</b><br>(9.2 , 12.9)           |
| <b>Afghanistan</b>                  | <b>5741</b><br>(4579 , 7298)       | <b>78.8</b><br>(63.1 , 99.8)   | <b>14470</b><br>(11369 , 18333)    | <b>85.9</b><br>(68.8 , 108.9)  | <b>9</b><br>(2.5 , 16.2)              |
| <b>Algeria</b>                      | <b>11787</b><br>(9323 , 14822)     | <b>85.6</b><br>(68.4 , 107.3)  | <b>36290</b><br>(28880 , 45641)    | <b>97.2</b><br>(77.3 , 122.6)  | <b>13.5</b><br>(6.8 , 19.7)           |
| <b>Bahrain</b>                      | <b>309</b><br>(238 , 386)          | <b>102</b><br>(81.4 , 127.9)   | <b>1818</b><br>(1376 , 2311)       | <b>115.4</b><br>(91.6 , 144.3) | <b>13.1</b><br>(6.6 , 20.3)           |
| <b>Egypt</b>                        | <b>30167</b><br>(23805 , 37263)    | <b>89.2</b><br>(71.3 , 111.9)  | <b>74402</b><br>(59281 , 92868)    | <b>102.4</b><br>(82.2 , 128.5) | <b>14.8</b><br>(8.8 , 21.5)           |
| <b>Iran (Islamic Republic of)</b>   | <b>27337</b><br>(21575 , 34723)    | <b>89.2</b><br>(71.2 , 113)    | <b>78473</b><br>(61932 , 98315)    | <b>95.7</b><br>(76.2 , 121.4)  | <b>7.2</b><br>(5.4 , 9)               |
| <b>Iraq</b>                         | <b>8378</b><br>(6648 , 10401)      | <b>93</b><br>(73.9 , 116.8)    | <b>26852</b><br>(21041 , 33650)    | <b>95.6</b><br>(76 , 121.1)    | <b>2.8</b><br>(-2.8 , 8.7)            |
| <b>Jordan</b>                       | <b>1567</b><br>(1235 , 1963)       | <b>91.4</b><br>(72.8 , 116.4)  | <b>8503</b><br>(6621 , 10761)      | <b>103.3</b><br>(82.4 , 131.3) | <b>13</b><br>(6.4 , 19.2)             |
| <b>Kuwait</b>                       | <b>1114</b><br>(855 , 1399)        | <b>108.4</b><br>(86.1 , 137.9) | <b>4469</b><br>(3420 , 5600)       | <b>113.5</b><br>(90 , 143.2)   | <b>4.7</b><br>(-1.6 , 12)             |
| <b>Lebanon</b>                      | <b>2159</b><br>(1698 , 2748)       | <b>88.9</b><br>(70.8 , 113)    | <b>5069</b><br>(4058 , 6345)       | <b>95.7</b><br>(76.5 , 120.5)  | <b>7.7</b><br>(1.8 , 14)              |
| <b>Libya</b>                        | <b>2122</b><br>(1683 , 2638)       | <b>96.5</b><br>(76.9 , 122)    | <b>6174</b><br>(4849 , 7672)       | <b>100.1</b><br>(80.1 , 124.9) | <b>3.8</b><br>(-2.1 , 9.9)            |
| <b>Morocco</b>                      | <b>12905</b><br>(10311 , 16346)    | <b>83</b><br>(66.5 , 105.7)    | <b>31153</b><br>(24450 , 39270)    | <b>92</b><br>(73 , 116.2)      | <b>10.8</b><br>(4.3 , 16.7)           |
| <b>Oman</b>                         | <b>897</b><br>(692 , 1119)         | <b>89.1</b><br>(70.1 , 112.4)  | <b>3651</b><br>(2782 , 4600)       | <b>110.2</b><br>(87.7 , 138.6) | <b>23.7</b><br>(16.4 , 32.3)          |
| <b>Palestine</b>                    | <b>836</b><br>(668 , 1050)         | <b>84.8</b><br>(67.9 , 107.6)  | <b>2729</b><br>(2135 , 3400)       | <b>91.5</b><br>(72.8 , 115.3)  | <b>7.9</b><br>(2 , 13.8)              |
| <b>Qatar</b>                        | <b>332</b><br>(248 , 429)          | <b>117.5</b><br>(93.2 , 147.4) | <b>3048</b><br>(2311 , 3873)       | <b>137</b><br>(109.7 , 174.1)  | <b>16.7</b><br>(8.8 , 24.9)           |
| <b>Saudi Arabia</b>                 | <b>7955</b><br>(6229 , 9911)       | <b>98.7</b><br>(78.2 , 125)    | <b>32533</b><br>(24732 , 40855)    | <b>114.2</b><br>(91.4 , 143.5) | <b>15.8</b><br>(9.7 , 22.8)           |

|                             |                                 |                                |                                  |                                 |                              |
|-----------------------------|---------------------------------|--------------------------------|----------------------------------|---------------------------------|------------------------------|
| <b>Sudan</b>                | <b>8499</b><br>(6785 , 10705)   | <b>80.4</b><br>(64.3 , 101.1)  | <b>21297</b><br>(16849 , 26431)  | <b>93.8</b><br>(74.8 , 119.4)   | <b>16.6</b><br>(9.7 , 23.3)  |
| <b>Syrian Arab Republic</b> | <b>5481</b><br>(4360 , 6799)    | <b>89.7</b><br>(71.6 , 112.7)  | <b>12440</b><br>(9830 , 15832)   | <b>94.1</b><br>(75 , 119.2)     | <b>5</b><br>(-0.7 , 10.6)    |
| <b>Tunisia</b>              | <b>4765</b><br>(3785 , 5939)    | <b>85.8</b><br>(68.6 , 107.3)  | <b>11997</b><br>(9508 , 15219)   | <b>92.2</b><br>(73.4 , 116.6)   | <b>7.4</b><br>(2.2 , 13.1)   |
| <b>Turkey</b>               | <b>36087</b><br>(28713 , 45268) | <b>89.1</b><br>(70.9 , 112.6)  | <b>88711</b><br>(70737 , 111000) | <b>96.6</b><br>(77.2 , 121.7)   | <b>8.5</b><br>(3 , 14.4)     |
| <b>United Arab Emirates</b> | <b>1132</b><br>(833 , 1442)     | <b>106.4</b><br>(85.4 , 133.6) | <b>11590</b><br>(8466 , 15033)   | <b>125.7</b><br>(100.7 , 157.9) | <b>18.1</b><br>(10.5 , 25.2) |
| <b>Yemen</b>                | <b>4534</b><br>(3575 , 5695)    | <b>75.5</b><br>(60.2 , 95.3)   | <b>14099</b><br>(11239 , 17368)  | <b>84.1</b><br>(67.4 , 104.8)   | <b>11.5</b><br>(5.2 , 17.8)  |

**Table S3: YLDs due to gout in 1990 and 2019 and the percentage change in the age-standardised rates (ASRs) per 100,000 in the North Africa and the Middle East region**  
(Generated from data available from <http://ghdx.healthdata.org/gbd-results-tool>)

|                                     | 1990                            |                              | 2019                             |                              | Percentage change in ASRs per 100,000 |
|-------------------------------------|---------------------------------|------------------------------|----------------------------------|------------------------------|---------------------------------------|
|                                     | No (95% UI)                     | ASRs per 100,000 (95% UI)    | No (95% UI)                      | ASRs per 100,000 (95% UI)    |                                       |
| <b>North Africa and Middle East</b> | <b>27137</b><br>(16907 , 38843) | <b>14.2</b><br>(8.9 , 20.4)  | <b>77514</b><br>(48808 , 111730) | <b>15.8</b><br>(10 , 22.7)   | <b>11.7</b><br>(7.1 , 16.4)           |
| <b>Afghanistan</b>                  | <b>886</b><br>(550 , 1309)      | <b>12.3</b><br>(7.7 , 17.7)  | <b>2113</b><br>(1314 , 3066)     | <b>13.2</b><br>(8.3 , 19.2)  | <b>8</b><br>(-5.9 , 23.4)             |
| <b>Algeria</b>                      | <b>1837</b><br>(1152 , 2700)    | <b>13.8</b><br>(8.7 , 20.3)  | <b>5822</b><br>(3632 , 8416)     | <b>15.9</b><br>(9.9 , 23)    | <b>14.9</b><br>(1.3 , 32)             |
| <b>Bahrain</b>                      | <b>47</b><br>(29 , 69)          | <b>16.6</b><br>(10.3 , 24.3) | <b>291</b><br>(180 , 434)        | <b>18.9</b><br>(12 , 27.5)   | <b>13.9</b><br>(-0.7 , 30.5)          |
| <b>Egypt</b>                        | <b>4744</b><br>(2944 , 6940)    | <b>14.5</b><br>(9.2 , 21.1)  | <b>11900</b><br>(7337 , 17404)   | <b>16.9</b><br>(10.5 , 24.4) | <b>16.3</b><br>(1.8 , 32.9)           |
| <b>Iran (Islamic Republic of)</b>   | <b>4172</b><br>(2591 , 6028)    | <b>14.1</b><br>(8.7 , 20.4)  | <b>12230</b><br>(7692 , 17716)   | <b>15.2</b><br>(9.5 , 22)    | <b>7.5</b><br>(3.9 , 11.5)            |
| <b>Iraq</b>                         | <b>1306</b><br>(810 , 1882)     | <b>15</b><br>(9.4 , 21.5)    | <b>4159</b><br>(2661 , 5969)     | <b>15.4</b><br>(10 , 22.2)   | <b>2.5</b><br>(-10.5 , 17.2)          |
| <b>Jordan</b>                       | <b>242</b><br>(151 , 361)       | <b>14.9</b><br>(9.4 , 21.8)  | <b>1353</b><br>(837 , 1980)      | <b>17</b><br>(10.5 , 24.5)   | <b>14.2</b><br>(0.3 , 30.1)           |
| <b>Kuwait</b>                       | <b>172</b><br>(105 , 250)       | <b>18.1</b><br>(11.1 , 26.5) | <b>714</b><br>(432 , 1055)       | <b>19</b><br>(11.7 , 27.6)   | <b>5.2</b><br>(-7 , 20.7)             |
| <b>Lebanon</b>                      | <b>344</b><br>(213 , 514)       | <b>14.4</b><br>(8.9 , 21)    | <b>821</b><br>(516 , 1182)       | <b>15.5</b><br>(9.8 , 22.5)  | <b>8.1</b><br>(-5 , 24.1)             |
| <b>Libya</b>                        | <b>336</b><br>(210 , 499)       | <b>15.8</b><br>(9.9 , 23.6)  | <b>973</b><br>(598 , 1433)       | <b>16.2</b><br>(10 , 23.8)   | <b>2.3</b><br>(-10.2 , 16.5)          |
| <b>Morocco</b>                      | <b>2016</b><br>(1272 , 2944)    | <b>13.4</b><br>(8.4 , 19.5)  | <b>4964</b><br>(3100 , 7149)     | <b>14.8</b><br>(9.2 , 21.5)  | <b>10.9</b><br>(-3 , 26.7)            |
| <b>Oman</b>                         | <b>134</b><br>(84 , 199)        | <b>14.1</b><br>(8.7 , 20.7)  | <b>547</b><br>(338 , 798)        | <b>17.9</b><br>(11.2 , 25.7) | <b>26.6</b><br>(9.6 , 46.2)           |
| <b>Palestine</b>                    | <b>129</b><br>(83 , 187)        | <b>13.6</b><br>(8.8 , 19.8)  | <b>419</b><br>(260 , 603)        | <b>14.6</b><br>(9.1 , 21.2)  | <b>7.3</b><br>(-6 , 22.6)             |
| <b>Qatar</b>                        | <b>50</b><br>(30 , 74)          | <b>19.4</b><br>(12.2 , 28.1) | <b>461</b><br>(283 , 683)        | <b>22.5</b><br>(14.5 , 32.7) | <b>16.4</b><br>(0.9 , 34.5)           |
| <b>Saudi Arabia</b>                 | <b>1211</b><br>(749 , 1786)     | <b>15.9</b><br>(9.8 , 23.3)  | <b>4996</b><br>(3196 , 7188)     | <b>18.6</b><br>(11.8 , 26.7) | <b>17.5</b><br>(2.8 , 35.1)           |

|                             |                              |                              |                                |                              |                             |
|-----------------------------|------------------------------|------------------------------|--------------------------------|------------------------------|-----------------------------|
| <b>Sudan</b>                | <b>1306</b><br>(826 , 1865)  | <b>12.8</b><br>(8.1 , 18.5)  | <b>3288</b><br>(2104 , 4821)   | <b>15.1</b><br>(9.6 , 22)    | <b>18.5</b><br>(2.7 , 34.6) |
| <b>Syrian Arab Republic</b> | <b>858</b><br>(539 , 1250)   | <b>14.6</b><br>(9.1 , 21.2)  | <b>2003</b><br>(1243 , 2926)   | <b>15.3</b><br>(9.7 , 22.3)  | <b>4.5</b><br>(-8.9 , 19.7) |
| <b>Tunisia</b>              | <b>752</b><br>(471 , 1083)   | <b>13.9</b><br>(8.8 , 19.9)  | <b>1936</b><br>(1196 , 2795)   | <b>14.9</b><br>(9.2 , 21.5)  | <b>7.3</b><br>(-6.2 , 23.6) |
| <b>Turkey</b>               | <b>5727</b><br>(3537 , 8330) | <b>14.5</b><br>(8.9 , 20.9)  | <b>14525</b><br>(9000 , 21308) | <b>15.9</b><br>(9.9 , 23.3)  | <b>9.4</b><br>(-4 , 25.7)   |
| <b>United Arab Emirates</b> | <b>166</b><br>(99 , 251)     | <b>17.2</b><br>(10.7 , 24.7) | <b>1788</b><br>(1077 , 2712)   | <b>20.5</b><br>(12.9 , 29.9) | <b>19.6</b><br>(3 , 39.5)   |
| <b>Yemen</b>                | <b>685</b><br>(420 , 1012)   | <b>11.9</b><br>(7.4 , 17.5)  | <b>2133</b><br>(1349 , 3134)   | <b>13.3</b><br>(8.4 , 19.5)  | <b>12.4</b><br>(-2.2 , 29)  |

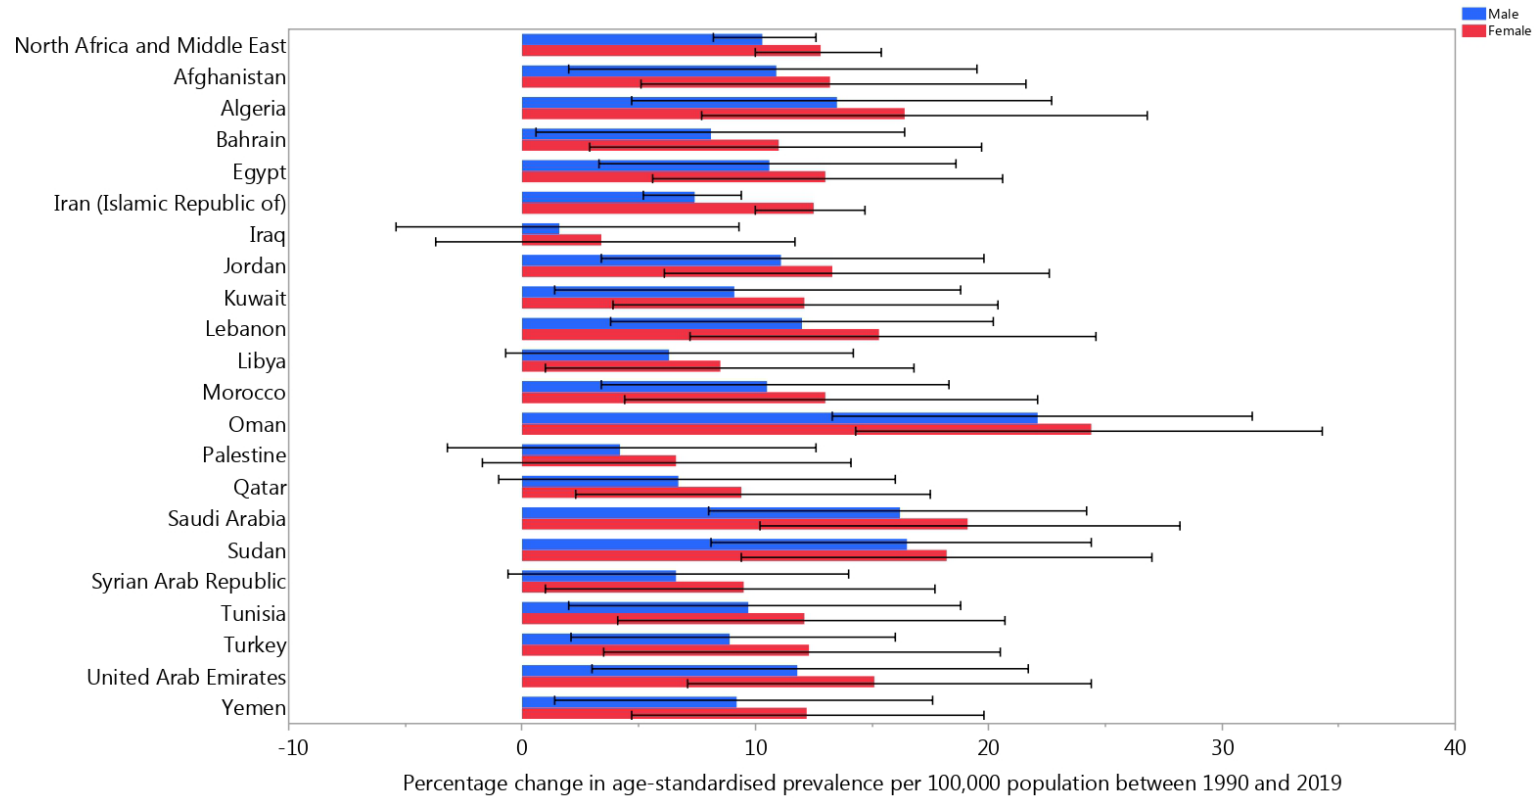

**Figure S1:** The percentage change in the age-standardised point prevalence of gout in the Middle East and North Africa region from 1990 to 2019, by sex and country. (Generated from data available from <http://ghdx.healthdata.org/gbd-results-tool>).

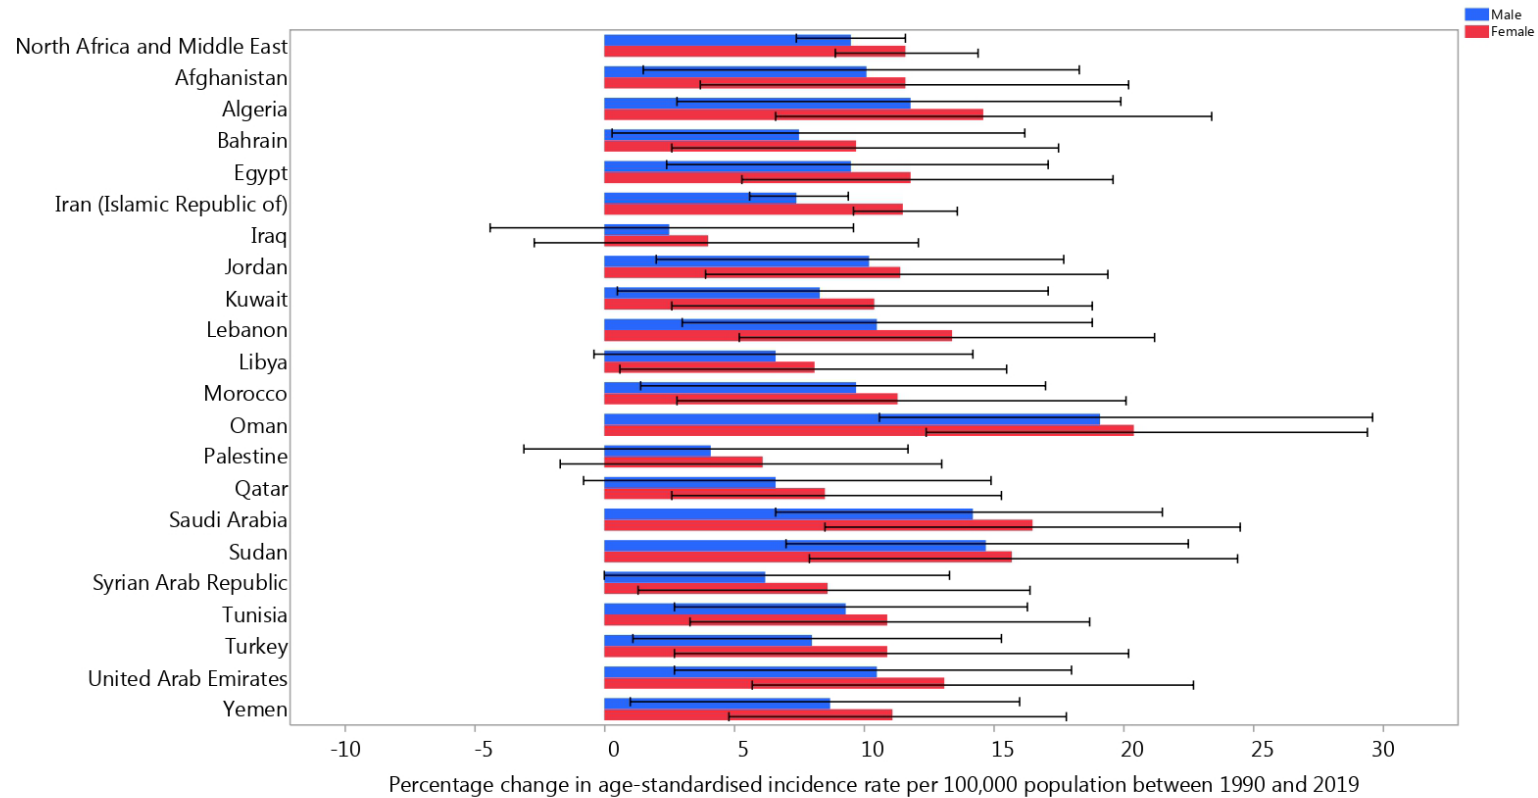

**Figure S2:** The percentage change in the age-standardised incidence of gout in the Middle East and North Africa region from 1990 to 2019, by sex and country. (Generated from data available from <http://ghdx.healthdata.org/gbd-results-tool>).



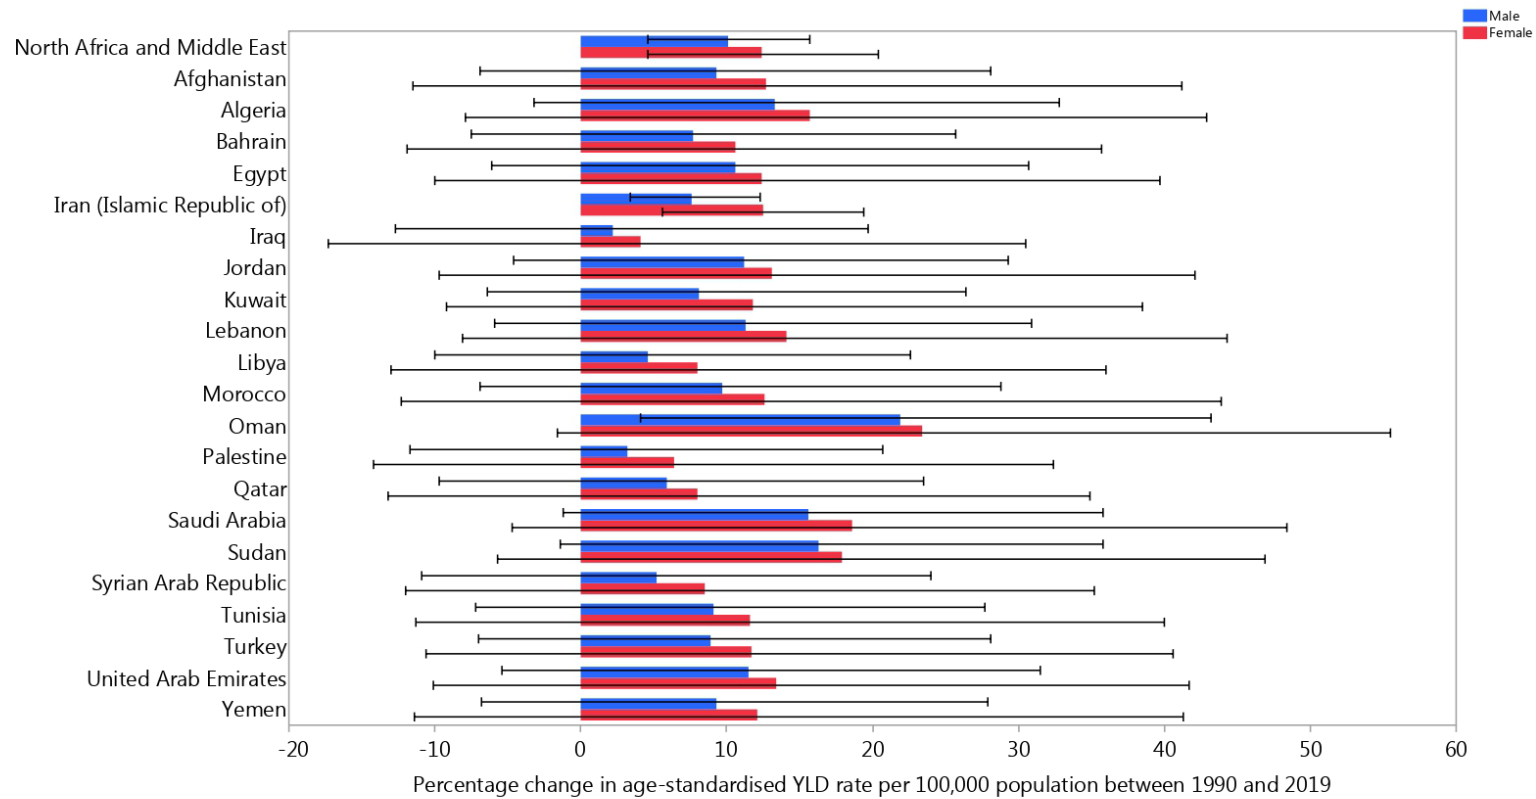

**Figure S3:** The percentage change in the age-standardised YLDs of gout in the Middle East and North Africa region from 1990 to 2019, by sex and country. YLD= years lived with disability. (Generated from data available from <http://ghdx.healthdata.org/gbd-results-tool>).
